# Supplementary material for: Unprecedented 3D entanglement of 1D zigzag coordination polymers leading to a robust microporous framework
Source: Royal Society of Chemistry journal article supplement (doi:10.1039/b613295b), 2006-11-03
Supplement: b613295b.pdf [file b613295b.pdf]

## Electronic Supplementary Information

### Unprecedented 3D entanglement of 1D zigzag coordination polymers leading to a robust microporous framework

Ai-Ling Cheng, Na Liu, Yan-Feng Yue, Yong-Wen Jiang, En-Qing Gao,\* Chun-Hua Yan and Ming-Yuan He

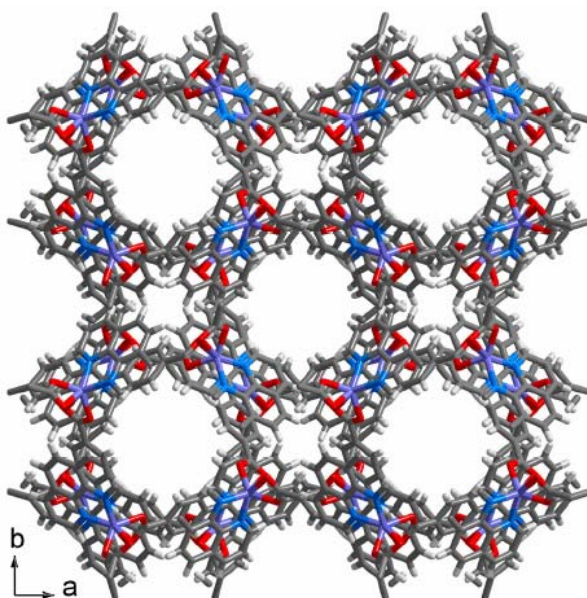

**Fig. S1** View showing the 3D framework of **1** with open channels along *c* direction. DMSO has been omitted

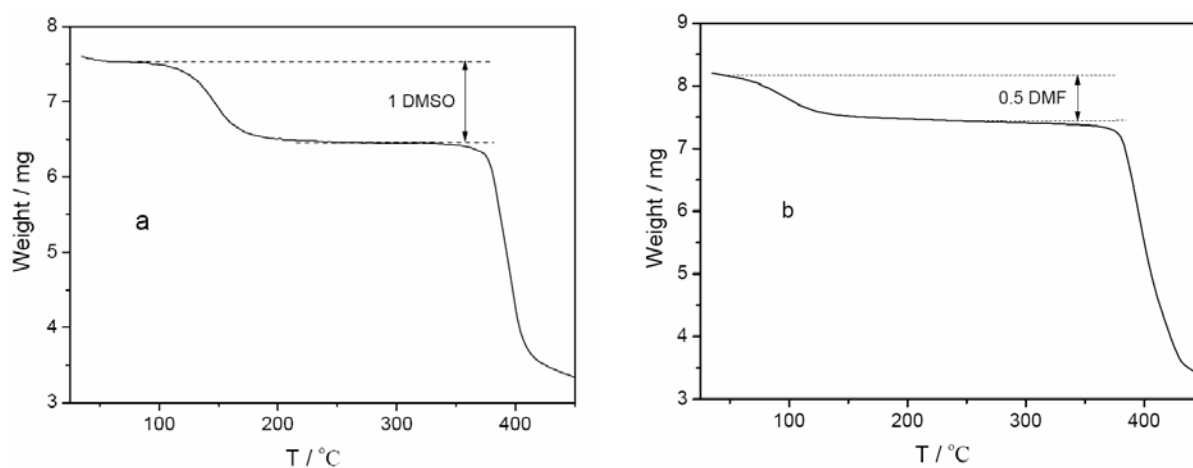

**Fig. S2** TGA plots of **1**·DMSO (a) and **1**·DMF (b) over the temperature range from 30 to 500 °C at a heating rate of  $\beta = 3$  °C/min under the  $N_2$  atmosphere. **1**·DMF was obtained by immersing the evacuated material in DMF for 10 h.

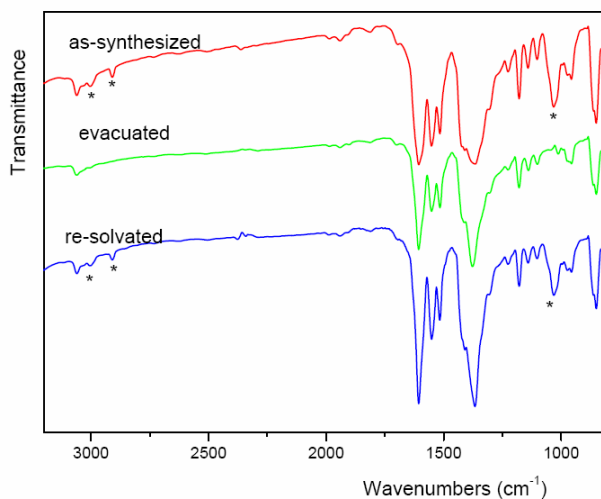

**Fig. S3** IR Spectra of the as-synthesized sample **1**·DMSO, the evacuated sample **1**, and the re-solvated sample. The bands marked with asterisks are attributable to the  $\nu(\text{CH}_3)$  absorptions (3000 and 2910  $\text{cm}^{-1}$ ) and the  $\nu(\text{S}=\text{O})$  absorption (1030  $\text{cm}^{-1}$ ), clearly indicating the presence of DMSO molecules in the as-synthesized and the re-solvated samples.

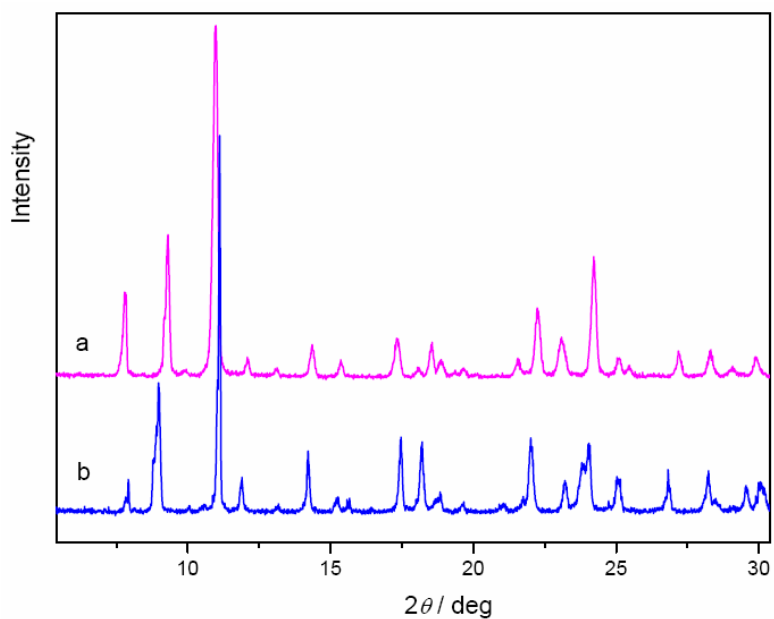

**Fig. S4** XRD pattern for (a) **1** (evacuated at 120 °C under vacuum for 24 h), and (b) **1**·DMF (obtained by immersing **1** in DMF for 10 h)

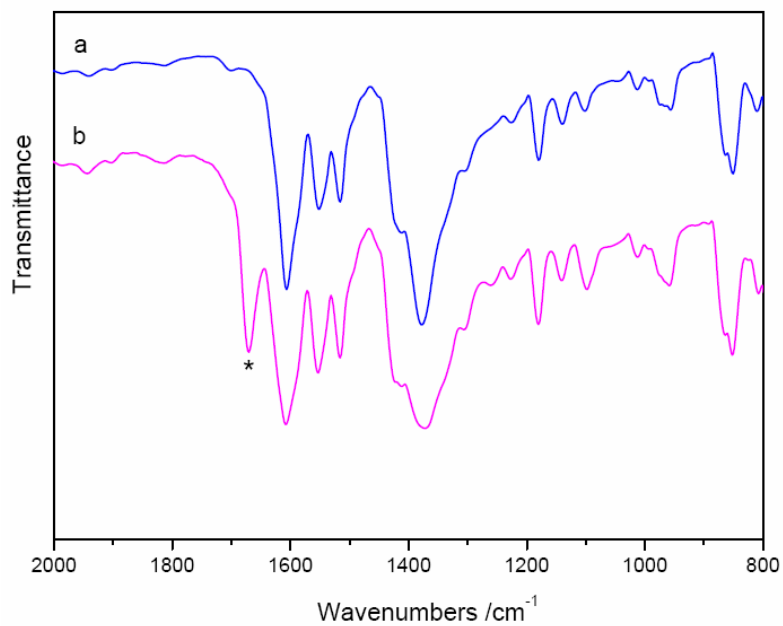

**Fig.S5** Comparison of the IR Spectra of the evacuated sample **1** (a), and the re-solvated **1**·DMF obtained by immersing **1** in DMF for 10 h (b). The band (1660 cm<sup>-1</sup>) marked with asterisk is attributable to the ν(C=O) absorption of the DMF molecules in **1**·DMF.
